# Supplementary material for: Exosomal miRNA Let-7 from Menstrual Blood-Derived Endometrial Stem Cells Alleviates Pulmonary Fibrosis through Regulating Mitochondrial DNA Damage
Source: Hindawi journal article supplement (doi:10.1155/2019/4506303), 2019-12-17
Supplement: f1 [file 4506303.f1.pdf]

**Fig. S1**

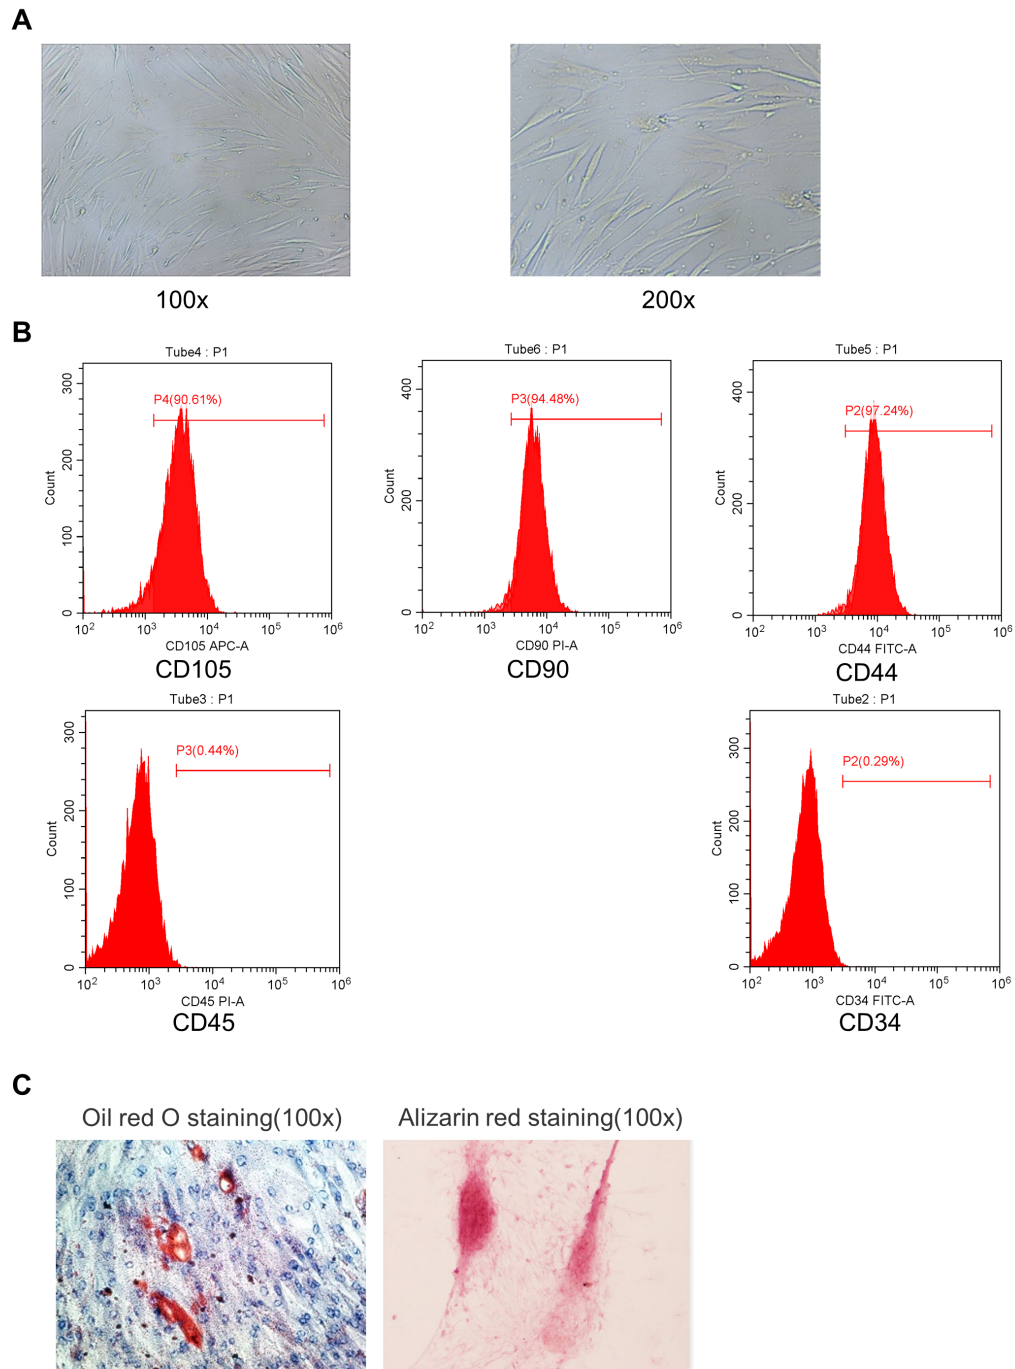

**Figure S1. Identification of prepared MenSCs.** (A) MenSCs morphology (third generation) were observed by optical microscope. (B) Detection of CD105, CD90, CD44, CD45, CD34 expression in MenSCs by flow cytometry. (C) Oil red O and Alizarin Red staining for detecting the adipogenic osteogenic measurement differentiation abilities of MenSCs.

**Fig. S2**

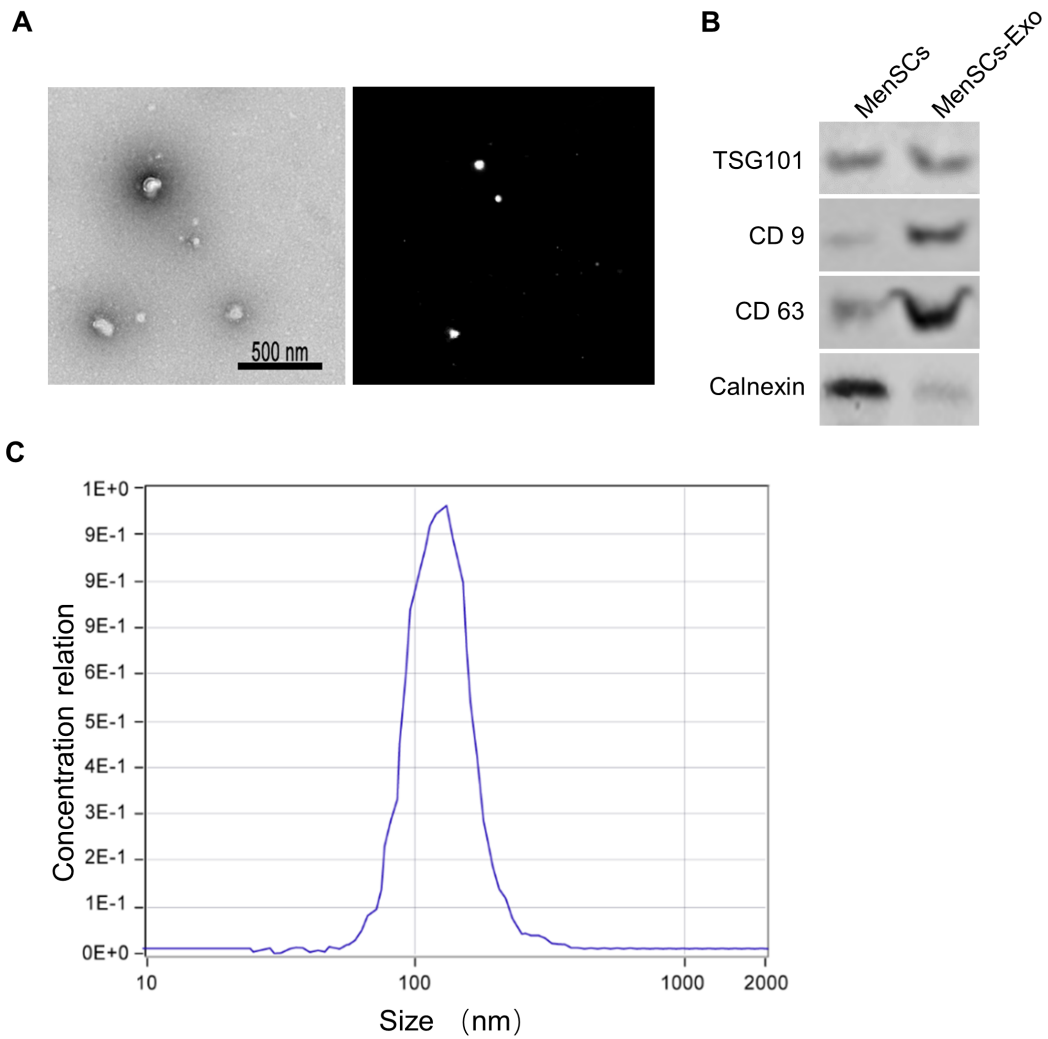

**Figure S2. Verification of MenSCs-derived exosome. (A)** Electron microscopy results (left) and video screenshots from particle matrix detection (right) of MenSCs-derived exosomes. **(B)** Expression of TSG101, CD9, CD63 and Calnexin were determined by WB in MenSCs-derived exosome. **(C)** Concentration-particle size distribution of exosomes from MenSCs by NTA detection.

**Fig. S3**

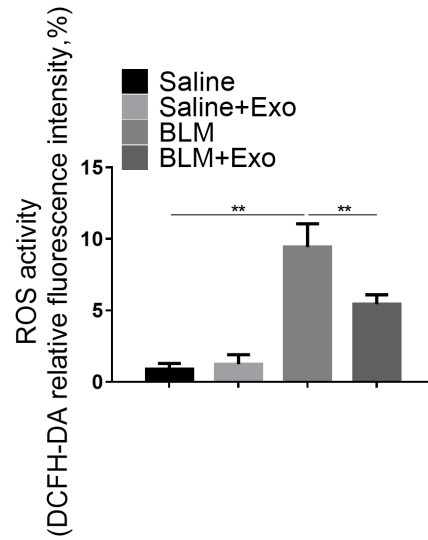

**Figure S3. Relative activity of ROS in lung tissue.** Quantitative analysis of the ROS level via evaluating the fluorescence intensity. **\*\* $p < 0.01$** .

**Fig. S4**

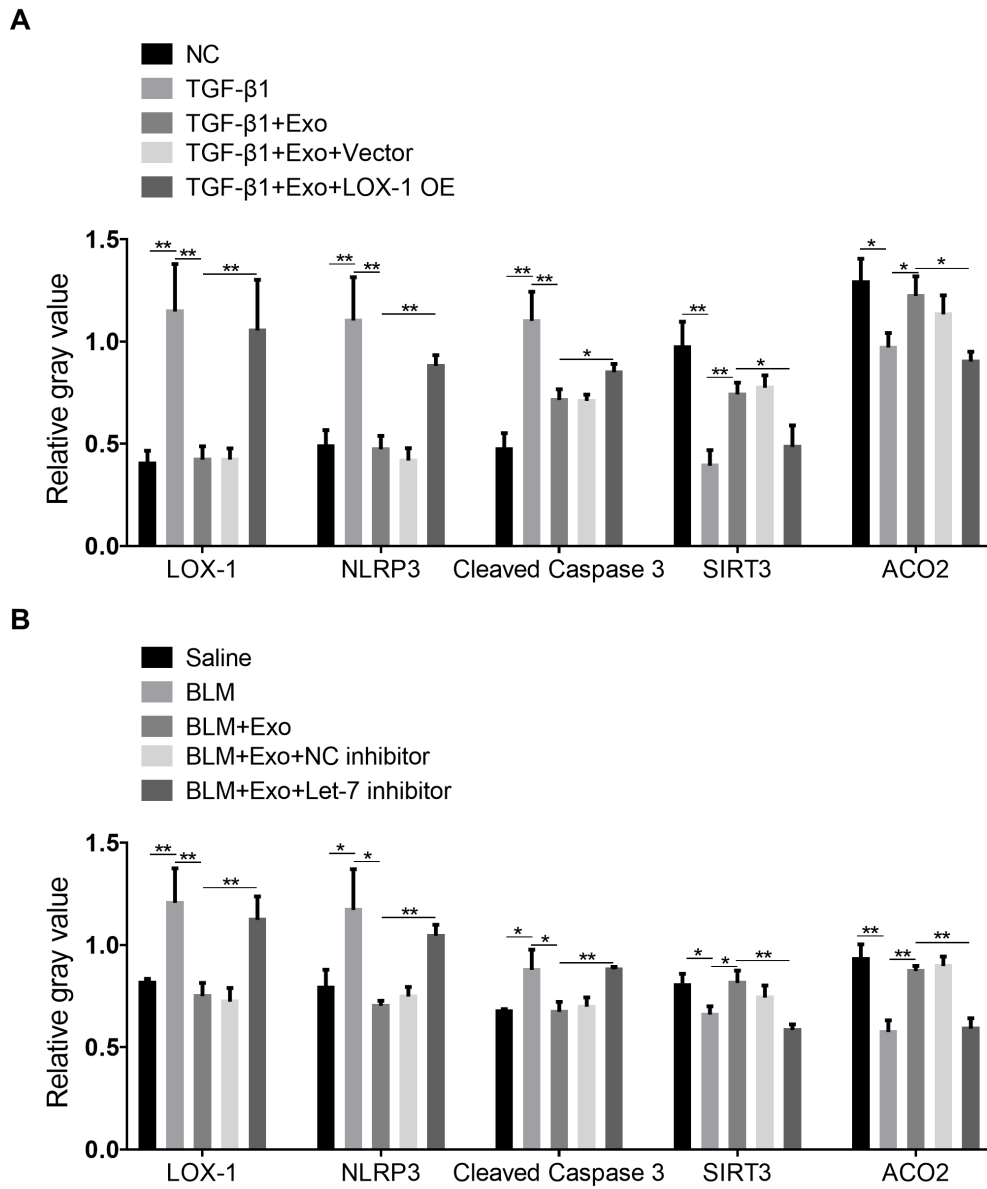

**Figure S4. Relative expression of apoptosis- and mtDNA damage-related signal cascades.** Quantitative analysis of LOX1/NLRP3/caspase 3 and mtDNA damage markers SIRT3 and ACO2 in MLE-12 cells (A) and in mice lung tissue (B). \* $p < 0.05$ , \*\* $p < 0.01$ .
